# Supplementary material for: Oxide ion distribution, vacancy ordering and electrical behaviour in the Bi3NbO7–Bi3YbO6pseudo-binary system
Source: Royal Society of Chemistry journal article supplement (doi:10.1039/c4ta03225j), 2014-01-01
Supplement: c4ta03225j1.pdf [file c4ta03225j1.pdf]

### Supplementary information

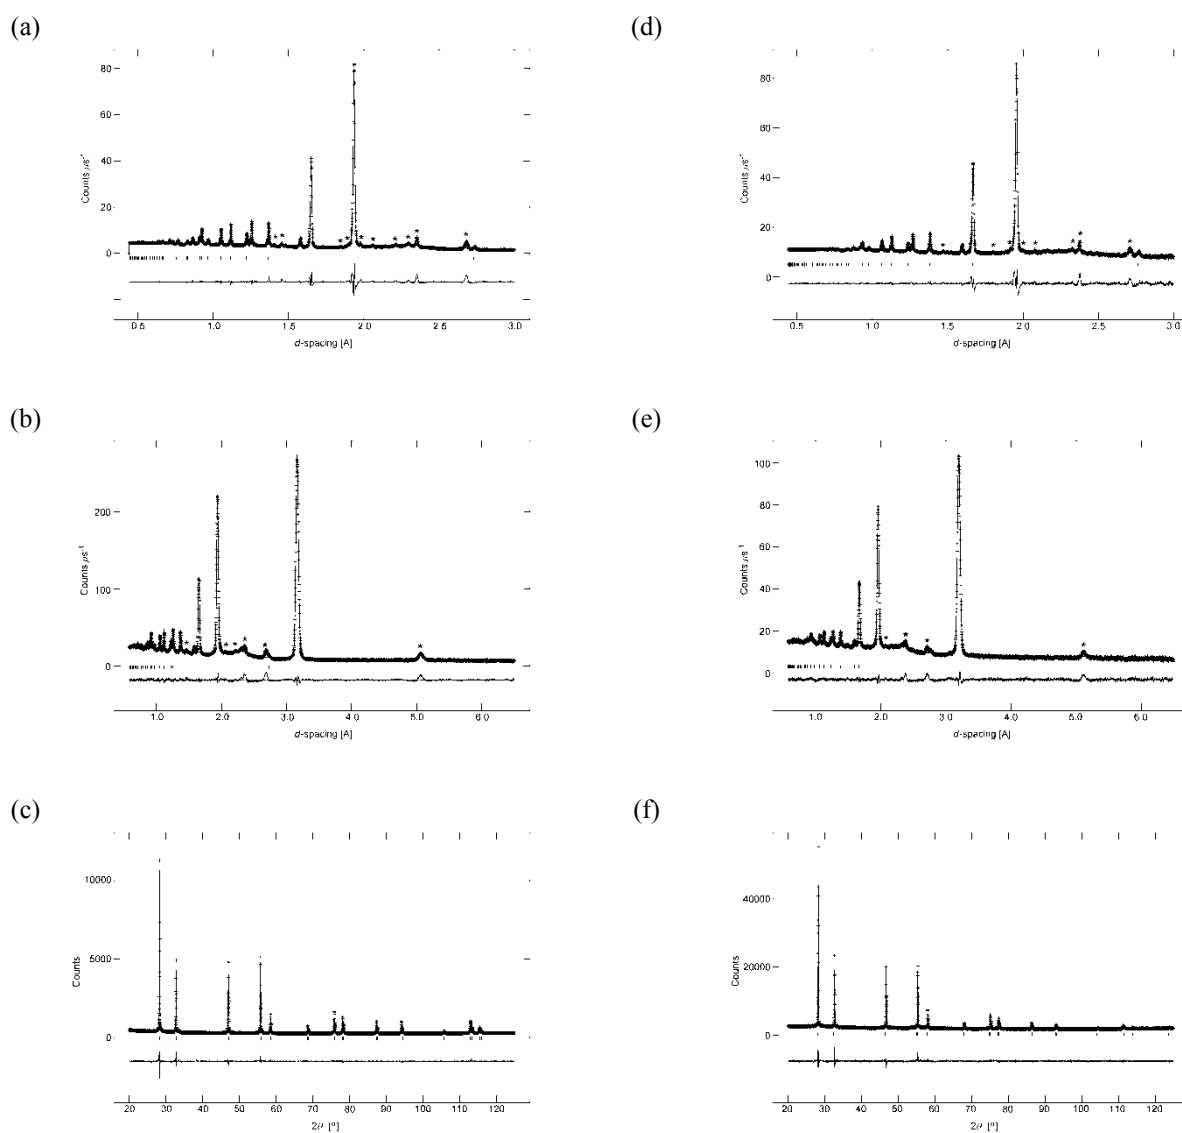

Fig. S1. Diffraction profiles for  $\text{Bi}_3\text{Nb}_{0.8}\text{Yb}_{0.2}\text{O}_{6.8}$  at room temperature (a) to (c) and 800°C (d) to (f), fitted by Rietveld analysis, showing neutron back scattering (a) and (d), neutron low angle (b) and (e) and X-ray (c) and (f) data. Observed (+ symbols), calculated (line) and difference (lower) profiles are shown, with reflection positions indicated by markers. Significant superlattice peaks are indicated by an asterisk.

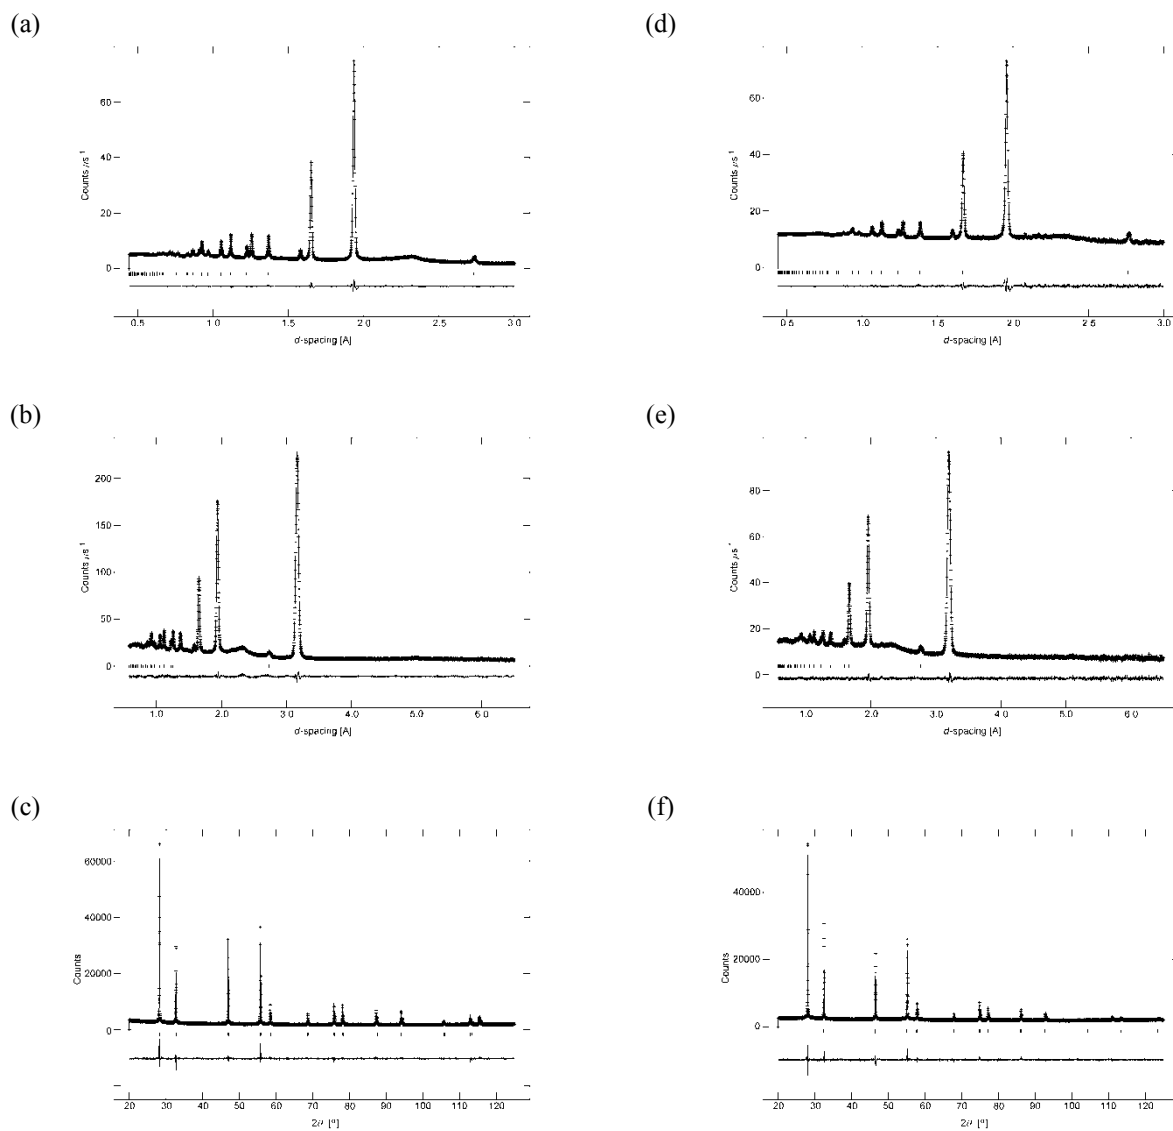

Fig. S2. Diffraction profiles for  $\text{Bi}_3\text{Nb}_{0.6}\text{Yb}_{0.4}\text{O}_{6.6}$  at room temperature (a) to (c) and  $800^\circ\text{C}$  (d) to (f), fitted by Rietveld analysis, showing neutron back scattering (a) and (d), neutron low angle (b) and (e) and X-ray (c) and (f) data. Observed (+ symbols), calculated (line) and difference (lower) profiles are shown, with reflection positions indicated by markers.

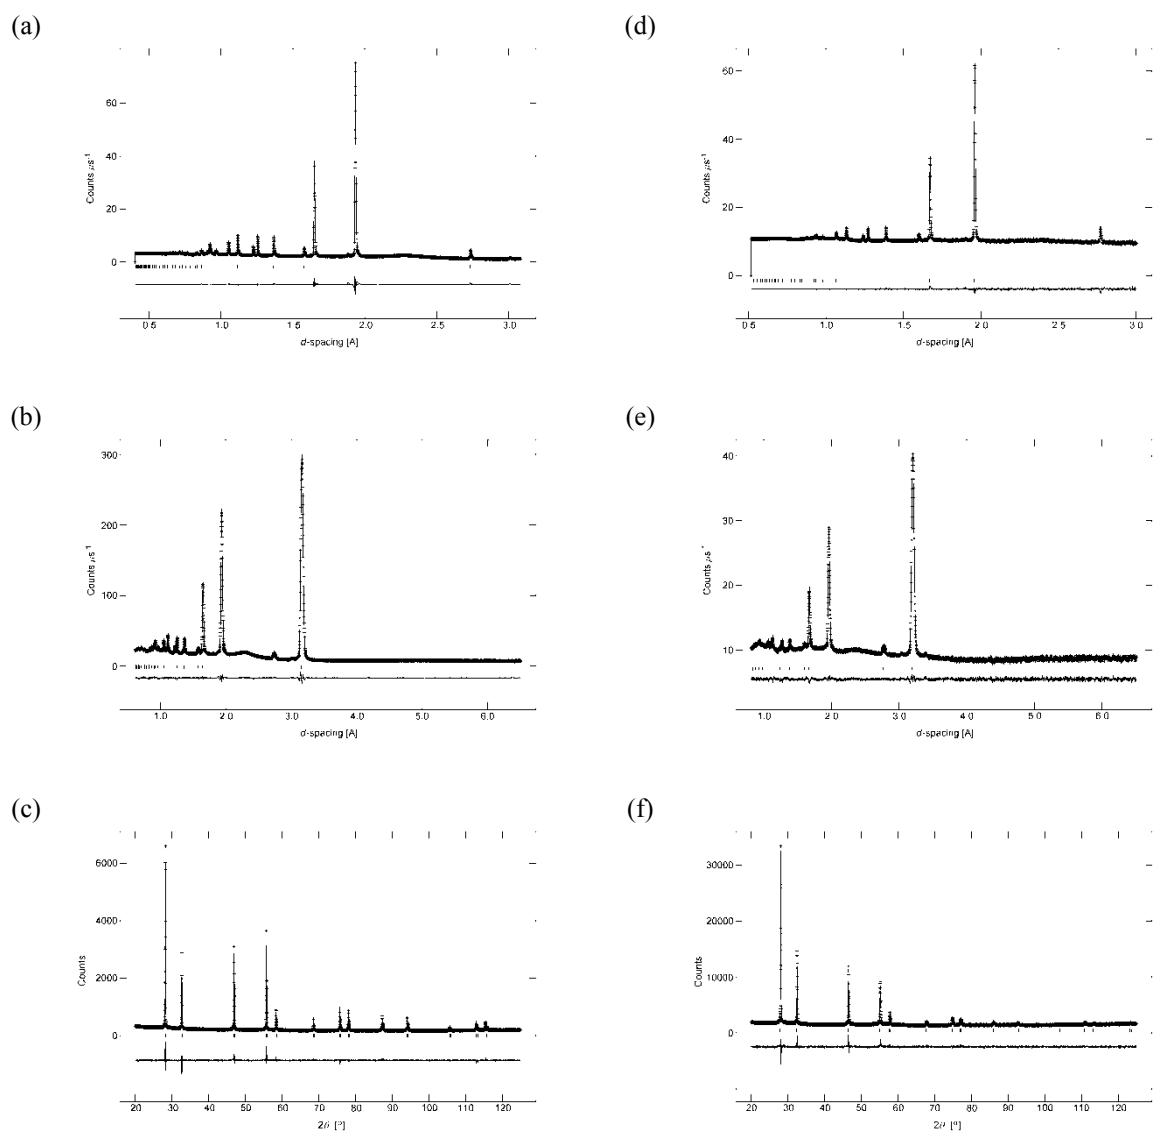

Fig. S3. Diffraction profiles for  $\text{Bi}_3\text{Nb}_{0.4}\text{Yb}_{0.6}\text{O}_{6.4}$  at room temperature (a) to (c) and 800°C (d) to (f), fitted by Rietveld analysis, showing neutron back scattering (a) and (d), neutron low angle (b) and (e) and X-ray (c) and (f) data. Observed (+ symbols), calculated (line) and difference (lower) profiles are shown, with reflection positions indicated by markers.
